# Supplementary material for: Preparation of one-dimensional coordination polymers of a flexible tripyridyl disulfide with diverse topologies
Source: Royal Society of Chemistry journal article supplement (doi:10.1039/d3ce00457k), 2023-01-01
Supplement: d3ce00457k1.pdf [file d3ce00457k1.pdf]

## **Electronic supplementary information**

**for**

### **Preparation of one-dimensional coordination polymers of a flexible tripyridyl disulfide with diverse topologies**

Hyeong-Hwan Lee,<sup>a</sup> Jihye Oh,<sup>b</sup> Shim Sung Lee,<sup>b</sup> and In-Hyeok Park\*<sup>b</sup>

*<sup>a</sup>Division of Applied Life Science (BK21 Four), Institute of Agriculture and Life Sciences,  
Gyeongsang National University, Jinju 52828, S. Korea*

*<sup>b</sup>Graduate School of Analytical Science and Technology, Chungnam National University,  
Daejeon 34134, S. Korea*

## Experimental section

**General.** All chemicals and solvents used in the syntheses were of reagent grade and were used without further purification. NMR spectra were recorded on a Bruker 300 spectrometer (300 MHz). The FT-IR spectra were measured with a Nicolet iS 10 spectrometer. The elemental analysis was carried out on a LECO CHNS-932 elemental analyzer. The powder X-ray diffraction (PXRD) experiments were performed in a transmission mode with a Bruker GADDS diffractometer equipped with graphite monochromated CuK $\alpha$  radiation ( $\lambda = 1.54073 \text{ \AA}$ ). Thermogravimetric analyses (TGA) were performed under a nitrogen atmosphere with a heating rate of  $10 \text{ K min}^{-1}$  using a TA Instruments TGA-Q50 thermogravimetric analyzer.

**CAUTION:** The perchlorate-containing complex is potentially explosive and appropriate precautions should be taken during their preparation, handling and storage.

**Preparation of  $\{[\text{Cu}(\text{L})_2(\text{NO}_3)_2] \cdot \text{CH}_2\text{Cl}_2\}_n$  (1).** A small amount of toluene was added to a dichloromethane (1 mL) solution of **L** (20.1 mg, 0.061 mmol); then the required copper(II) nitrate (16.0 mg, 0.061 mmol) in acetonitrile was layered on the toluene phase; the (layered) mixture afforded a dark blue crystalline product suitable for X-ray analysis. Mp: 158-161 °C. IR (KBr pellet): 3090, 3035, 2928, 1598, 1535, 1489, 1384 ( $\text{NO}_3^-$ ), 1304, 1226, 1115, 1064, 854, 819, 723  $\text{cm}^{-1}$ . Anal. Calcd for  $[\text{C}_{17.7}\text{H}_{15.8}\text{N}_4\text{O}_3\text{S}_2\text{Cu}]$ : C, 46.20; H, 3.46; N, 12.17; S, 13.93. Found: C, 45.80; H, 3.35; N, 12.20; S, 14.21%.

**Preparation of  $\{[\text{Ag}(\text{L})\text{NO}_3] \cdot \text{CH}_2\text{Cl}_2\}_n$  (2).** A small amount of toluene was added to a dichloromethane (1 mL) solution of **L** (20.0 mg, 0.061 mmol); then the required silver(I) nitrate (10.4 mg, 0.061 mmol) in acetonitrile was layered on the toluene phase; the (layered) mixture afforded a colorless crystalline product suitable for X-ray analysis. Mp: 199-203°C (decomp.). IR (KBr pellet): 3057, 2975, 2922, 1589, 1570, 1483, 1348 ( $\text{NO}_3^-$ ), 1216, 1109, 1011, 800, 760, 723, 711  $\text{cm}^{-1}$ ; Anal. Calcd for  $[\text{C}_{20.25}\text{H}_{21.7}\text{N}_4\text{O}_4\text{S}_2\text{AgCl}_{2.3}]$ : C, 38.08; H, 3.42; N, 8.77. Found: C, 37.78; H, 3.05; N, 8.42%.

**Preparation of  $\{[\text{Ag}(\text{L})(\text{CH}_3\text{CN})]\text{PF}_6\}_n$  (3).** A small amount of toluene was added to a dichloromethane (1 mL) solution of **L** (20.0 mg, 0.061 mmol); then the required silver(I) hexafluorophosphate (15.5 mg, 0.061 mmol) in acetonitrile was layered on the toluene phase; the (layered) mixture afforded a colorless crystalline product suitable for X-ray analysis. Mp: 205-208 °C (decomp.). IR (KBr pellet): 3089, 3069, 3026, 2977, 1588, 1573, 1483, 1455, 1418,

1273, 1031, 841 ( $\text{PF}_6^-$ )  $\text{cm}^{-1}$ . Anal. Calcd for  $[\text{C}_{19.8}\text{H}_{18.7}\text{N}_{3.7}\text{S}_2\text{AgPF}_6]$ : C, 38.02; H, 3.01; N, 8.29. Found: C, 37.78; H, 3.05; N, 8.42%.

**Preparation of  $\{[\text{Ag}(\text{L})\text{ClO}_4]\cdot\text{CH}_2\text{Cl}_2\}_n$  (4).** A small amount of toluene was added to a dichloromethane (1 mL) solution of **L** (20.2 mg, 0.062 mmol); then the required silver(I) perchlorate (12.9 mg, 0.062 mmol) in acetonitrile was layered on the toluene phase; the (layered) mixture afforded a colorless crystalline product suitable for X-ray analysis. Mp: 188-191 °C (decomp.). IR (KBr pellet): 3085, 3058, 2908, 1585, 1482, 1449, 1449, 1417, 1107, 1085 ( $\text{ClO}_4^-$ ), 806, 621 ( $\text{ClO}_4^-$ )  $\text{cm}^{-1}$ . Anal. Calcd for  $[\text{C}_{17.8}\text{H}_{16.6}\text{AgCl}_{2.6}\text{N}_3\text{O}_4\text{S}_2]$  as  $\{[\text{Ag}(\text{L})\text{ClO}_4]\cdot 0.9\text{CH}_2\text{Cl}_2\}_n$ : C, 35.59; H, 2.79; N, 7.00. Found: C, 35.71; H, 2.53; N, 7.16%.

**X-ray crystallographic analysis.** Crystal data for **L** and **1-4** were collected on a Bruker SMART APEX II ULTRA diffractometer equipped with graphite monochromated Mo  $\text{K}\alpha$  radiation ( $\lambda = 0.71073 \text{ \AA}$ ) generated by a rotating anode. The cell parameters for the compounds were obtained from a least-squares refinement of the spot (from 36 collected frames). Data collection, data reduction, and semi-empirical absorption correction were carried out using the software package of APEX2.<sup>S1</sup> All of the calculations for the structure determination were carried out using the SHELXTL package.<sup>S2</sup> In all cases, all nonhydrogen atoms were refined anisotropically and all hydrogen atoms except coordinated water molecules were placed in idealized positions and refined isotropically in a riding manner along with their respective parent atoms. Relevant crystal data collection and refinement data for the crystal structures of **1-4** are summarised in Tables 1-5.

## References

- S1. Bruker, *APEX2 Version 2009.1-0 Data Collection and Processing Software*; Bruker AXS Inc.: Madison, WI, 2008.
- S2. Bruker, *SHELXTL-PC Version 6.22 Program for Solution and Refinement of Crystal Structures*; Bruker AXS Inc.: Madison, WI, 2001.

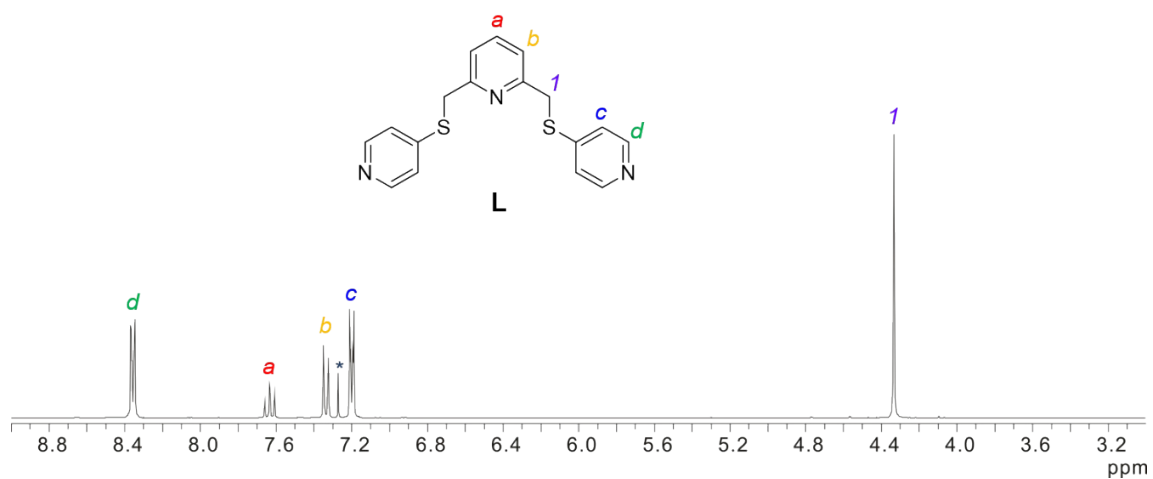

**Fig. S1**  $^1\text{H}$  NMR spectrum of **L** in  $\text{CDCl}_3$ .

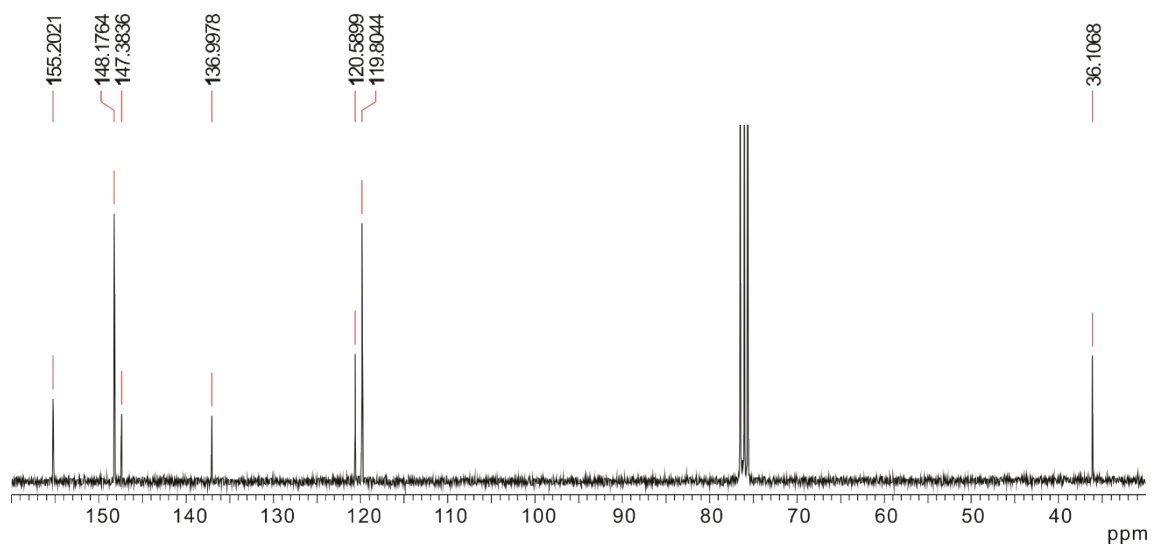

**Fig. S2**  $^{13}\text{C}$  NMR spectrum of **L** in  $\text{CDCl}_3$ .

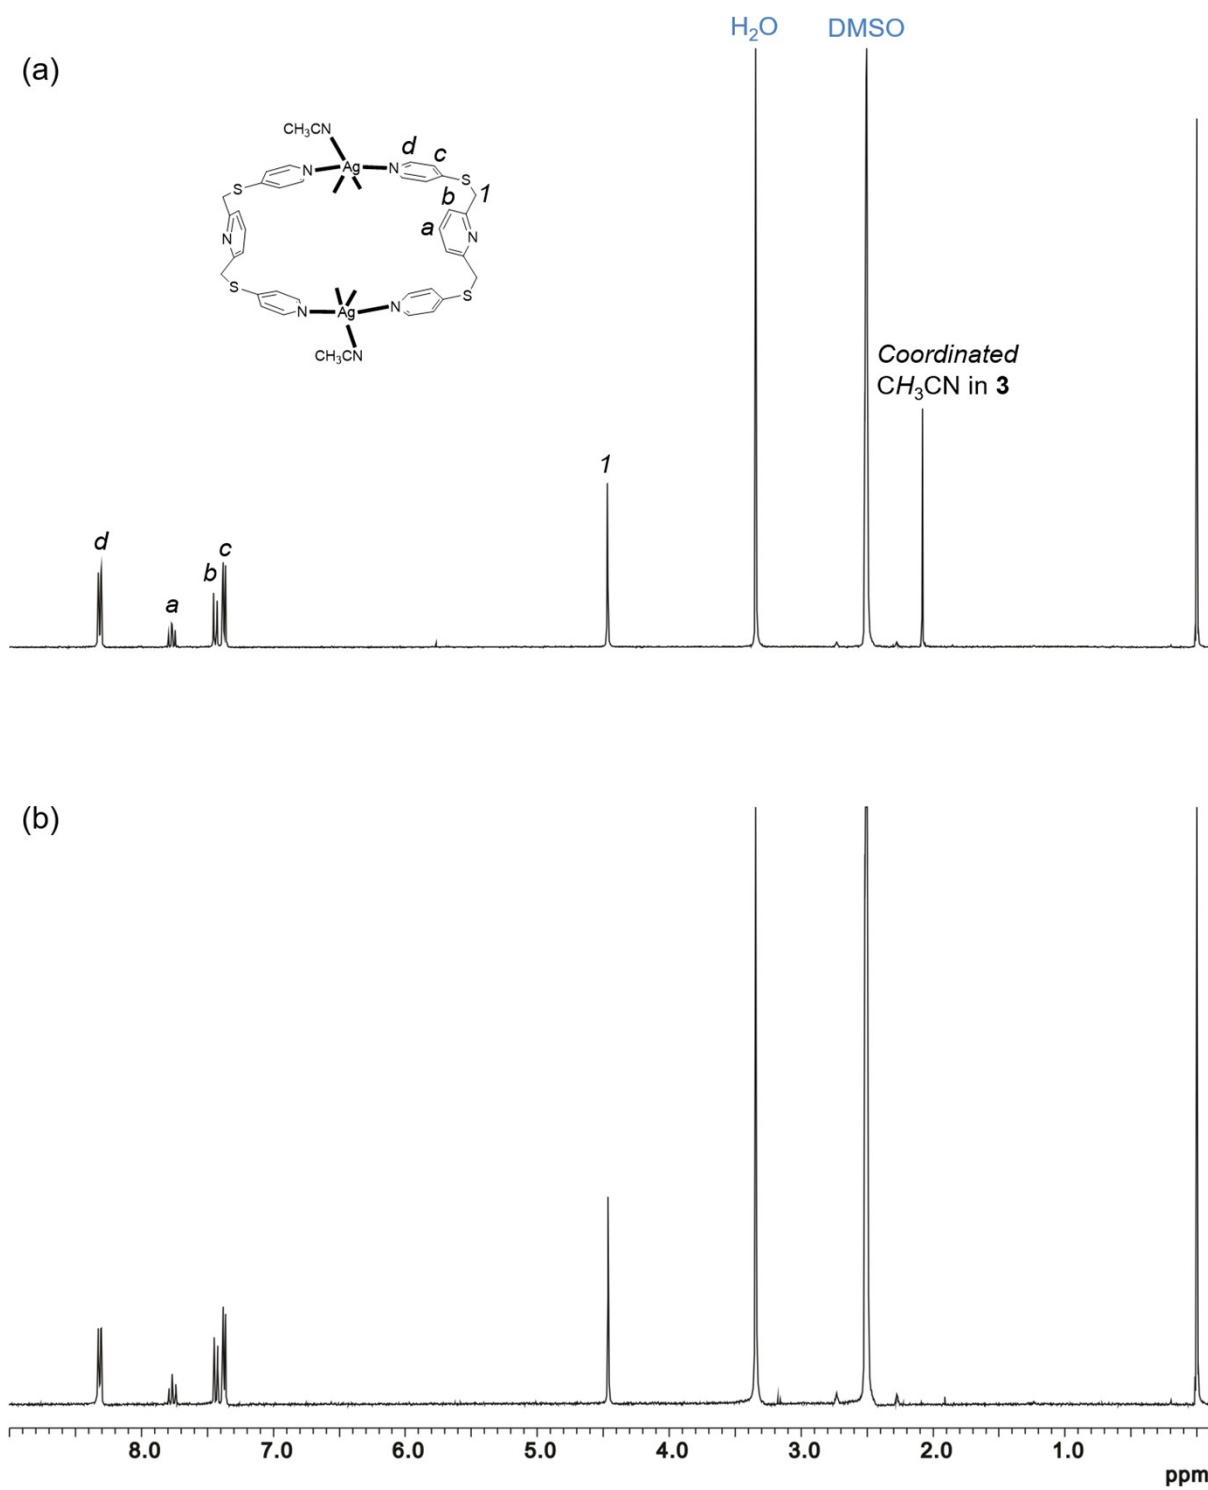

**Fig. S3** NMR spectra of (a) **3** (PF<sub>6</sub>-form) and (b) its anion-exchanged product [PF<sub>6</sub><sup>-</sup> by NO<sub>3</sub><sup>-</sup>] obtained after 48 h showing the removal of the coordinated acetonitrile molecules (singlet at 2.10 ppm).

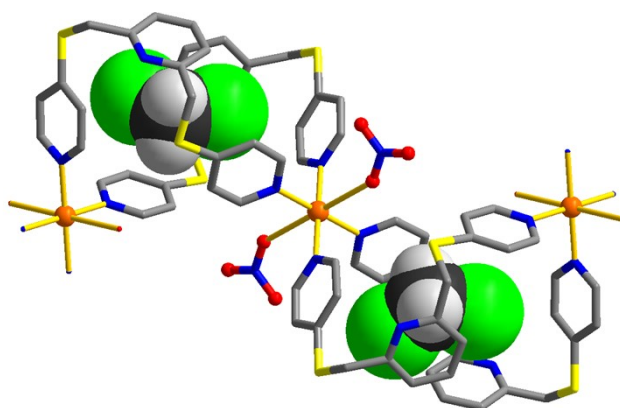

**Fig. S4** Single crystal X-ray structure of **1**,  $\{[\text{Cu}(\text{L})_2(\text{NO}_3)_2] \cdot \text{CH}_2\text{Cl}_2\}_n$ .

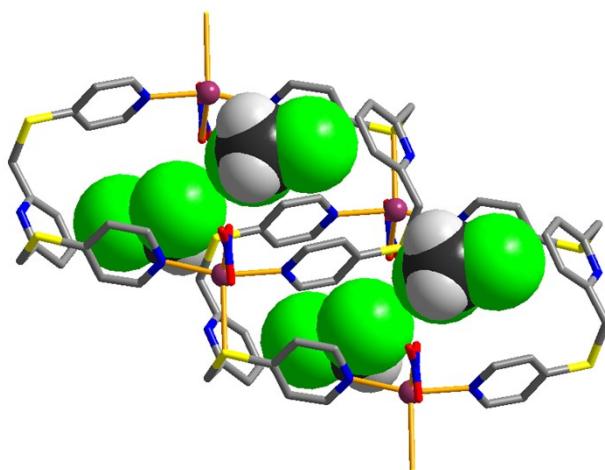

**Fig. S5** Single crystal X-ray structure of **2**,  $\{[\text{Ag}(\text{L})\text{NO}_3] \cdot \text{CH}_2\text{Cl}_2\}_n$ .

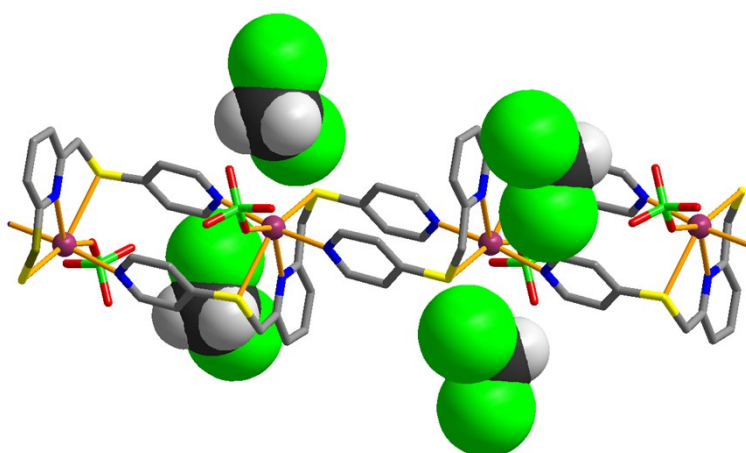

**Fig. S6** Single crystal X-ray structure of **4**,  $\{[\text{Ag}(\text{L})\text{ClO}_4] \cdot \text{CH}_2\text{Cl}_2\}_n$ .

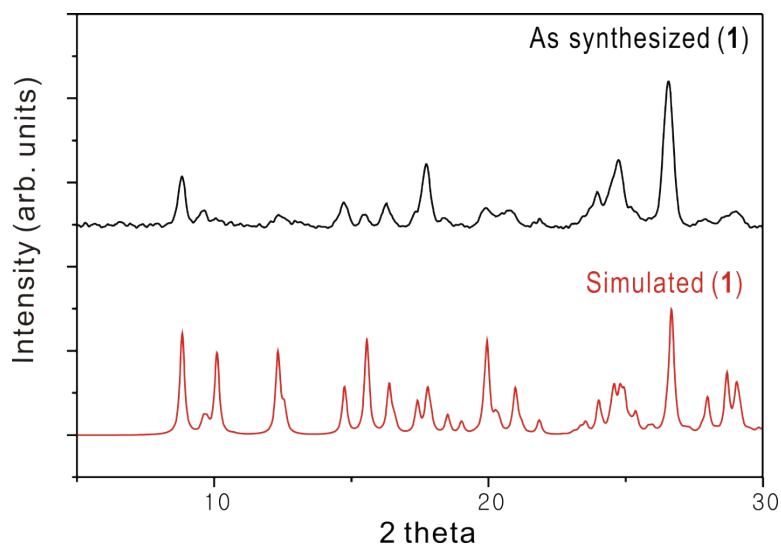

**Fig. S7** PXRD patterns for **1**: (top) as synthesized and (bottom) simulated from the single crystal X-ray data. The discrepancies in the intensities may be due to preferred orientations of the powder or partial removal of solvents during grinding.

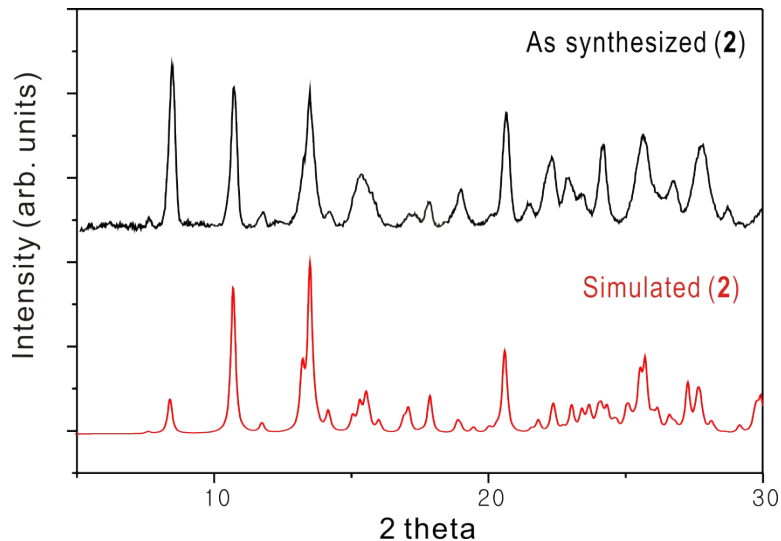

**Fig. S8** PXRD patterns for **2**: (top) as synthesized and (bottom) simulated from the single crystal X-ray data. The discrepancies in the intensities may be due to preferred orientations of the powder or partial removal of solvents during grinding.

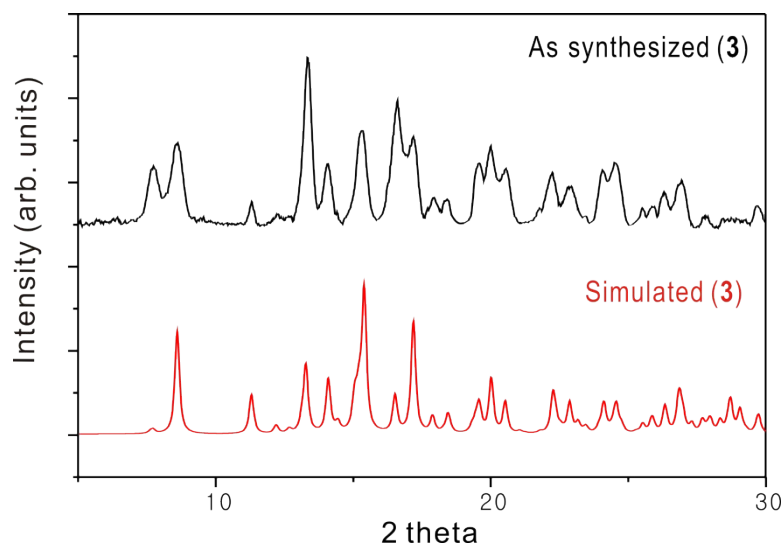

**Fig. S9** PXRD patterns for **3**: (top) as synthesized and (bottom) simulated from the single crystal X-ray data. The discrepancies in the intensities may be due to preferred orientations of the powder or partial removal of solvents during grinding.

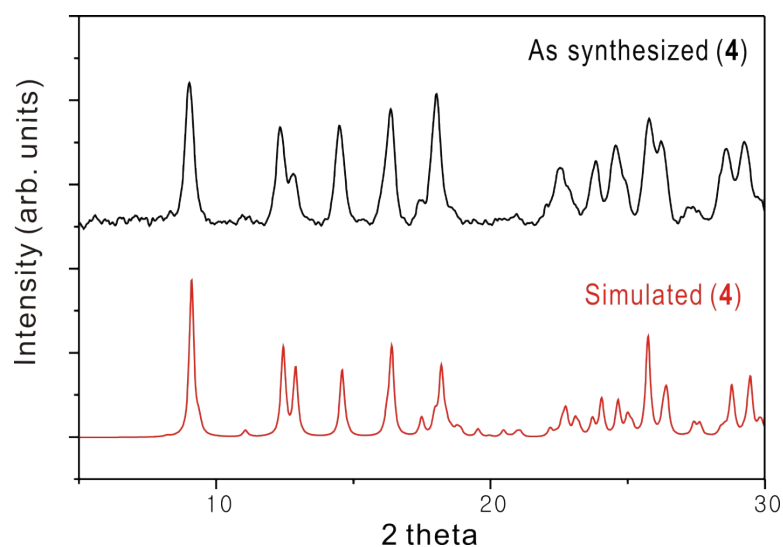

**Fig. S10** PXRD patterns for **4**: (top) as synthesized and (bottom) simulated from the single crystal X-ray data. The discrepancies in the intensities may be due to preferred orientations of the powder or partial removal of solvents during grinding.



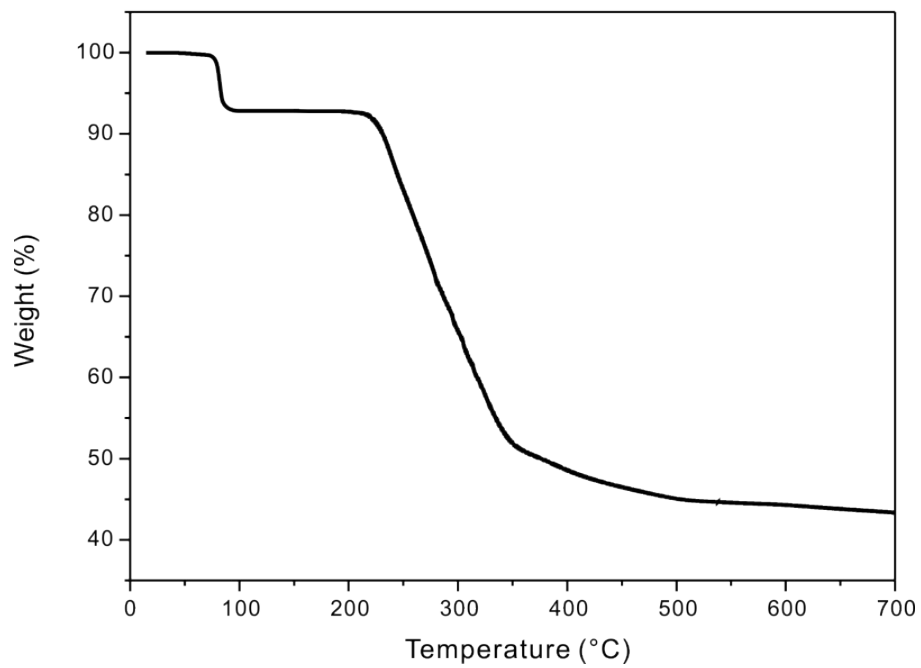

**Fig. S11** TGA curve of **1**.

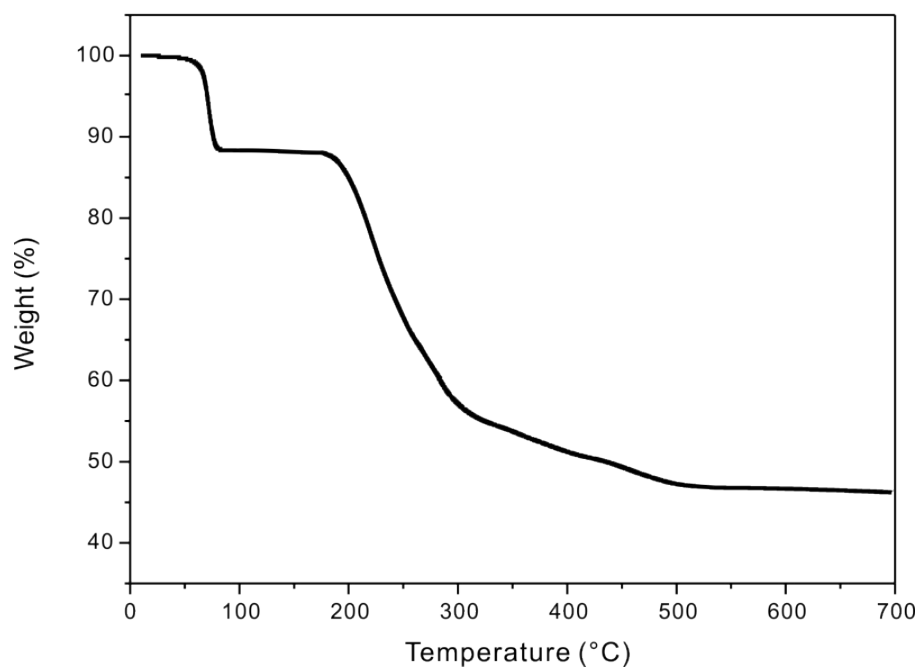

**Fig. S12** TGA curve of **2**.

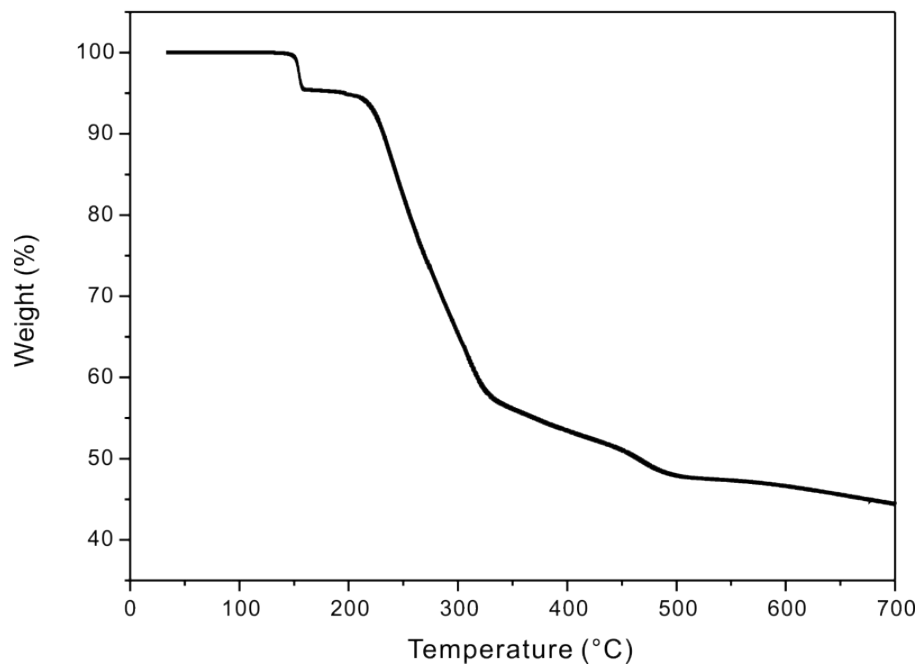

**Fig. S13** TGA curve of **3**.

**Table S1** Crystallographic data and refinement parameters of **1-4**

|                                                                                      | <b>1</b>                                                                                                       | <b>2</b>                                                                                       | <b>3</b>                                                                        | <b>4</b>                                                                                       |
|--------------------------------------------------------------------------------------|----------------------------------------------------------------------------------------------------------------|------------------------------------------------------------------------------------------------|---------------------------------------------------------------------------------|------------------------------------------------------------------------------------------------|
| Formula                                                                              | C <sub>70</sub> H <sub>64</sub> Cl <sub>4</sub> Cu <sub>2</sub> N <sub>16</sub> O <sub>12</sub> S <sub>8</sub> | C <sub>18</sub> H <sub>17</sub> AgCl <sub>2</sub> N <sub>4</sub> O <sub>3</sub> S <sub>2</sub> | C <sub>19</sub> H <sub>18</sub> AgF <sub>6</sub> N <sub>4</sub> PS <sub>2</sub> | C <sub>18</sub> H <sub>17</sub> AgCl <sub>3</sub> N <sub>3</sub> O <sub>4</sub> S <sub>2</sub> |
| Formula weight                                                                       | 1846.73                                                                                                        | 580.24                                                                                         | 619.33                                                                          | 617.68                                                                                         |
| Temperature                                                                          | 173(2)                                                                                                         | 173(2)                                                                                         | 173(2)                                                                          | 173(2)                                                                                         |
| Crystal system                                                                       | Monoclinic                                                                                                     | Monoclinic                                                                                     | Triclinic                                                                       | Triclinic                                                                                      |
| Space group                                                                          | <i>C2/c</i>                                                                                                    | <i>P2<sub>1</sub>/n</i>                                                                        | <i>P-1</i>                                                                      | <i>P-1</i>                                                                                     |
| <i>a</i> /Å                                                                          | 18.6359(6)                                                                                                     | 7.9319(3)                                                                                      | 8.05010(10)                                                                     | 9.8728(8)                                                                                      |
| <i>b</i> /Å                                                                          | 11.9828(6)                                                                                                     | 23.0680(10)                                                                                    | 12.5630(2)                                                                      | 10.2889(9)                                                                                     |
| <i>c</i> /Å                                                                          | 17.9652(7)                                                                                                     | 11.7359(5)                                                                                     | 12.6704(2)                                                                      | 10.9536(9)                                                                                     |
| <i>α</i> /deg                                                                        | 90                                                                                                             | 90                                                                                             | 68.6860(10)                                                                     | 80.721(5)                                                                                      |
| <i>β</i> /deg                                                                        | 103.225(3)                                                                                                     | 91.872(2)                                                                                      | 78.0620(10)                                                                     | 87.251(5)                                                                                      |
| <i>γ</i> /deg                                                                        | 90                                                                                                             | 90                                                                                             | 89.6740(10)                                                                     | 73.377(4)                                                                                      |
| <i>V</i> /Å <sup>3</sup>                                                             | 3905.4(3)                                                                                                      | 2146.21(15)                                                                                    | 1164.54(3)                                                                      | 1052.22(15)                                                                                    |
| <i>Z</i>                                                                             | 2                                                                                                              | 4                                                                                              | 2                                                                               | 2                                                                                              |
| <i>D</i> <sub>calc</sub> / (g/cm <sup>3</sup> )                                      | 1.570                                                                                                          | 1.796                                                                                          | 1.766                                                                           | 1.950                                                                                          |
| <i>μ</i> (mm <sup>-1</sup> )                                                         | 0.967                                                                                                          | 1.412                                                                                          | 1.177                                                                           | 1.571                                                                                          |
| 2 <i>θ</i> <sub>max</sub> (deg)                                                      | 52                                                                                                             | 52                                                                                             | 52.00                                                                           | 52.00                                                                                          |
| Reflections collected                                                                | 31014                                                                                                          | 19736                                                                                          | 19065                                                                           | 16013                                                                                          |
| Independent reflections                                                              | 3842 [ <i>R</i> <sub>int</sub> = 0.0815]                                                                       | 4197 [ <i>R</i> <sub>int</sub> = 0.0820]                                                       | 4589 [ <i>R</i> <sub>int</sub> = 0.0256]                                        | 4122 [ <i>R</i> <sub>int</sub> = 0.0442]                                                       |
| Goodness-of-fit on <i>F</i> <sup>2</sup>                                             | 1.042                                                                                                          | 1.029                                                                                          | 1.039                                                                           | 1.009                                                                                          |
| <i>R</i> <sub>1</sub> , <i>wR</i> <sub>2</sub> [ <i>I</i> > 2 <i>σ</i> ( <i>I</i> )] | 0.0437, 0.1027                                                                                                 | 0.1014, 0.2508                                                                                 | 0.0293, 0.0678                                                                  | 0.1429, 0.4537                                                                                 |
| <i>R</i> <sub>1</sub> , <i>wR</i> <sub>2</sub> [all data]                            | 0.0641, 0.1122                                                                                                 | 0.1231, 0.2663                                                                                 | 0.0358, 0.0705                                                                  | 0.1505, 0.4768                                                                                 |

**Table S2** Selected bond lengths (Å) and bond angles (°) for **1<sup>a</sup>**

|            |            |             |            |
|------------|------------|-------------|------------|
| Cu1-N1     | 2.018(2)   | Cu1-N3A     | 2.034(2)   |
| Cu1-O1     | 2.885(7)   |             |            |
| N1B-Cu1-N1 | 180.000(1) | N1B-Cu1-N3C | 90.00(10)  |
| N1-Cu1-N3A | 90.00(10)  | N1B-Cu1-N3C | 90.00(10)  |
| N1-Cu1-N3C | 90.00(10)  | N3A-Cu1-N3C | 180.000(1) |
| N1B-Cu1-O1 | 89.9(2)    | N1-Cu1-O1   | 90.1(2)    |
| N3C-Cu1-O1 | 88.6(2)    | N3B-Cu1-O1  | 91.4(2)    |

<sup>a</sup>Symmetry operations: (A) 1-x, y, 1.5-z; (B) 1-x, 1-y, 1-z; (C) x, 1-y, -0.5+z.

**Table S3** Selected bond lengths (Å) and bond angles (°) for **2<sup>a</sup>**

|            |          |             |            |
|------------|----------|-------------|------------|
| Ag1-N1     | 2.220(6) | Ag1-N3A     | 2.205(6)   |
| Ag1-O1     | 2.683(8) | Ag1-S2B     | 2.886(2)   |
| N1-Ag1-O1  | 91.2(3)  | N1-Ag1-S2B  | 95.37(16)  |
| N3A-Ag1-O1 | 88.3(3)  | N3A-Ag1-S2B | 104.06(17) |
| N3A-Ag1-N1 | 159.1(2) | O1-Ag1-S2B  | 112.71(18) |

<sup>a</sup>Symmetry operations: (A) 2-x, 2-y, -z; (B) 1-x, 2-y, -z.

**Table S4** Selected bond lengths (Å) and bond angles (°) for **3<sup>a</sup>**

|             |           |            |           |
|-------------|-----------|------------|-----------|
| Ag1-N3A     | 2.270(2)  | Ag1-N1B    | 2.280(2)  |
| Ag1-N4      | 2.595(3)  | Ag1-S2     | 2.7428(7) |
| Ag1-N2      | 2.786(2)  |            |           |
| N4-Ag1-N2   | 160.92(8) | S2-Ag1-N2  | 72.85(5)  |
| N4-Ag1-S2   | 88.53(7)  | N3A-Ag1-N4 | 92.65(9)  |
| N3A-Ag1-N2  | 89.09(7)  | N3A-Ag1-S2 | 107.30(6) |
| N3A-Ag1-N1B | 155.48(8) | N1B-Ag1-N2 | 94.87(7)  |
| N1B-Ag1-N4  | 91.40(9)  | N1B-Ag1-S2 | 96.97(6)  |

<sup>a</sup> Symmetry operations: (A) 1+x, y, z; (B) 1-x, 2-y, 1-z.

**Table S5** Selected bond lengths (Å) and bond Angles (°) for **4<sup>a</sup>**

|             |           |            |           |
|-------------|-----------|------------|-----------|
| Ag1-S1      | 2.865(3)  | Ag1-S2     | 2.832(3)  |
| Ag1-N2      | 2.744(9)  | Ag1-N1A    | 2.297(10) |
| Ag1-O1      | 2.914(11) | Ag1-N3B    | 2.276(10) |
| N3B-Ag1-N1A | 169.6(3)  | N3B-Ag1-N2 | 96.2(3)   |
| N1A-Ag1-N2  | 94.2(3)   | N3B-Ag1-S2 | 94.7(2)   |
| N1A-Ag1-S2  | 89.9(2)   | N2-Ag1-S2  | 69.2(2)   |
| N3B-Ag1-S1  | 89.7(3)   | N1A-Ag1-S1 | 93.0(2)   |
| N2-Ag1-S1   | 69.5(2)   | S2-Ag1-S1  | 138.69(8) |
| N3B-Ag1-O1  | 83.2(4)   | N1A-Ag1-O1 | 87.2(4)   |
| N2-Ag1-O1   | 161.6(4)  | S2-Ag1-O1  | 92.5(3)   |
| S1-Ag1-O1   | 128.8(3)  |            |           |

<sup>a</sup>Symmetry operations: (A) -x, -y, 1-z; (B) 1-x, -y, 2-z.
